# Supplementary material for: Synergistically assembled inorganic–organic multifunctional injectable bone cement with enhanced mechanical properties and osteogenesis
Source: Royal Society of Chemistry journal article supplement (doi:10.1039/d5tb02171e), 2025-12-09
Supplement: d5tb02171e1.pdf [file d5tb02171e1.pdf]

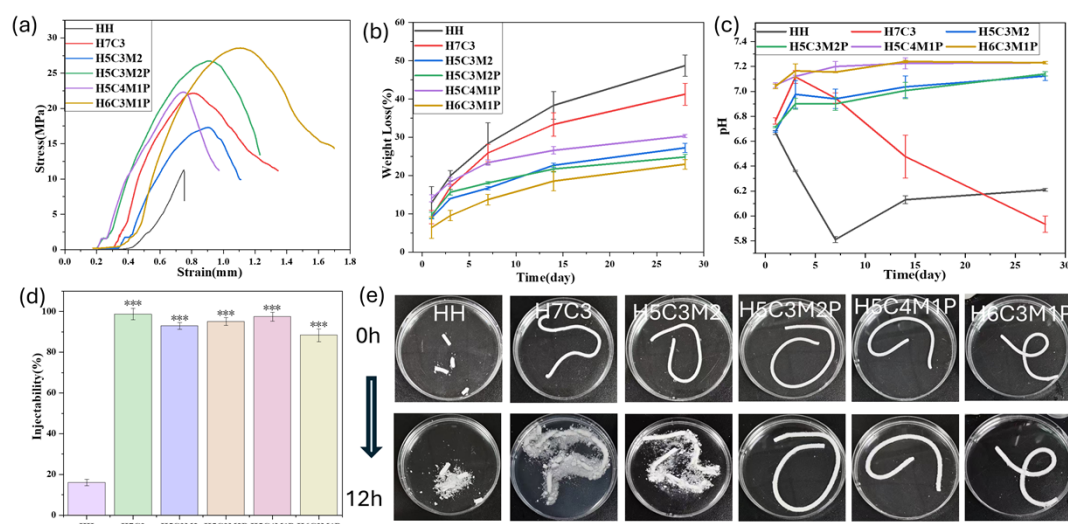

Figure S1. Physical properties and characterization of bone cement. (a) Stress-strain curve; (b) Weight loss rate and (c) the variation of pH value in PBS; (d) Quantitative results of injectability; (e) The injectability and anti-collapse properties of bone cements.

Table S1. The ion release kinetics model of  $\text{Ca}^{2+}$  and  $\text{Mg}^{2+}$

| Cement Label | Fitting curve ( $\text{Ca}^{2+}$ ) | $R^2$  | Fitting curve ( $\text{Mg}^{2+}$ ) | $R^2$  |
|--------------|------------------------------------|--------|------------------------------------|--------|
| HH           | $y=86.87t^{0.40}$                  | 0.9960 | -                                  | -      |
| H7C3         | $y=42.52t^{0.43}$                  | 0.9934 | -                                  | -      |
| H5C3M2       | $y=5.78t^{0.93}$                   | 0.9989 | $y=165.40t^{0.15}$                 | 0.9328 |
| H5C3M2P      | $y=11.81t^{0.63}$                  | 0.9838 | $y=113.99t^{0.20}$                 | 0.9101 |
| H5C4M1P      | $y=19.16t^{0.66}$                  | 0.9923 | $y=51.12t^{0.32}$                  | 0.9350 |
| H6C3M1P      | $y=18.18t^{0.63}$                  | 0.9903 | $y=42.28t^{0.36}$                  | 0.9470 |

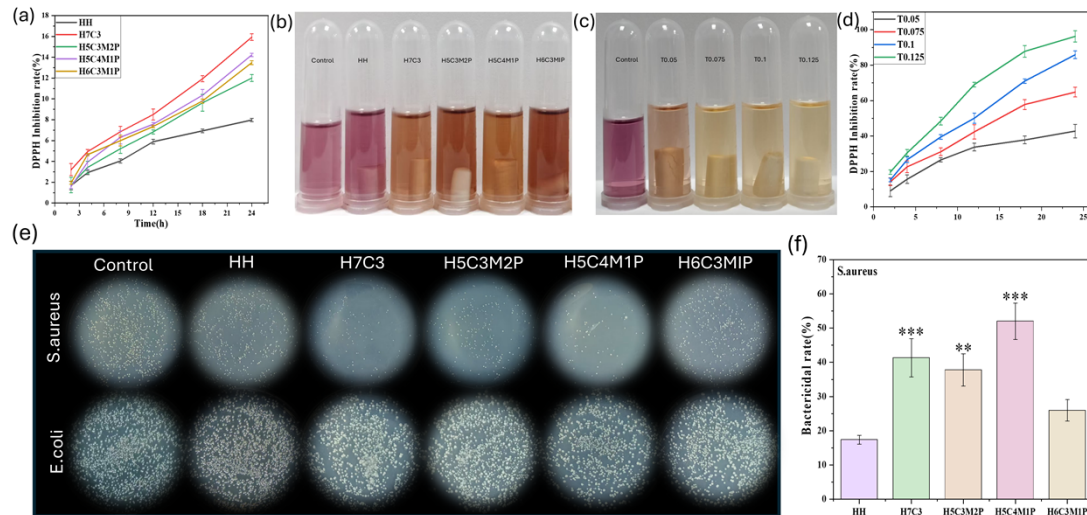

Figure S2. Antioxidant activity and antibacterial properties of bone cement. (a) Inhibition rate of DPPH by bone cement; (b) The color of ethanol solution containing DPPH after soaking in bone cement for 24 hours; (c, d) Inhibition rate of DPPH by bone cement with different HT concentrations and changes in DPPH solution color after co-culture for 24 hours; (e) The growth results of bacteria on solid culture media; (f) The bactericidal rate of *S. aureus* after co-cultivation for 12 hours.

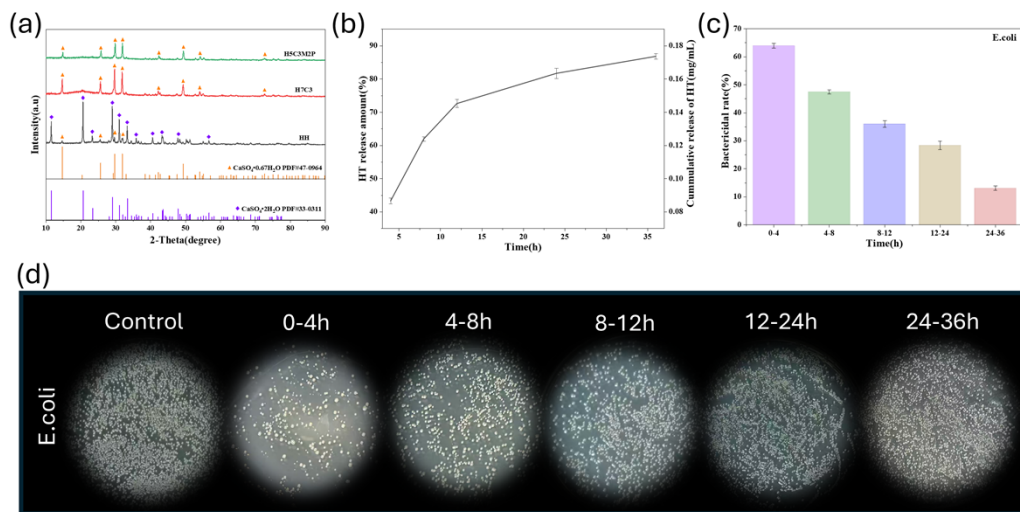

Figure S3. (a) XRD pattern of composite bone cement; (b) The release kinetic curve of HT; (c) The bactericidal rate of *Escherichia coli* exposed to extraction media collected at consecutive time intervals; (d) Antibacterial effect of extraction solution at different time periods.
